# Supplementary material
Source: PubMed Central journal article supplement (PMC521117)
Supplement: pnas_101_39_14040__2.pdf [file pnas_101_39_14040__2.pdf]

0            1            2            3            4            5            6

123456789012345678901234567890123456789012345678901234567890

AAAATCGATAGAACA AAAAGGATAAGGGCTCAGAGAGCTTCAGGGATATGTGATGGACTCA

CCAGGTGAGGCCGCCAGACTGCTGCAGGGGAAGCAAAGGAGAAGCTGAGAAGATGAAGGA

AAAGTCAGGGTCTGGAGGGGCGGGGGTCAGGGAGCTCCTGGGAGATATGGCCACATGTAG

CGGCTCTGAGGAATGGGTTACAGGAGACCTCTGGGGAGATGTGACCACAGCAATGGGTAG

GAGAATGTCCAGGGCTATGGAAGTCGAGTATGGGGACCCCCCTTAACGAAGACAGGGCC

ATGTAGAGGGCCCCAGGGAGTGAAAGAGCCTCCAGGACCTCCAGGTATGGAATACAGGGG

ACGTTTAAGAAGATATGGCCACACACCTCGAGTTT
